# Supplementary material
Source: PubMed Central journal article supplement (PMC3007142)

## **Supplemental Figure 1:**

(a) Representative lung histology of B6 (B6) and B6 (Bcl3<sup>-/-</sup>) mice (N=4). (b) (left panels) Representative FACS analysis and (right panel) percent abundance of granulocytes in the peripheral blood, lung tissue and spleen of resting B6 (B6) and B6

(Bcl3<sup>-/-</sup>) mice (N=4). Data are represented as a mean  $\pm$  s.d. and  $p > 0.13$  for all indicated tissues.

**Supplemental Figure 2:**

(a) (left panel) PaO<sub>2</sub> and (right panel) EBD exclusion at 6 and 24 hrs following LPS instillation down the airway of B6 (B6) or B6 (Bcl3<sup>-/-</sup>) mice. (b) Granulocyte numbers in the (left panel) BAL and (right) peripheral blood at 6 and 24 hrs following intratracheal LPS instillation in B6 (B6) or B6 (Bcl3<sup>-/-</sup>) mice. (c) Representative lung histology (100X) of B6 (B6) or B6 (Bcl3<sup>-/-</sup>) mice at 24 hrs following intratracheal LPS instillation.

**Supplemental Figure 3:**

(a) Myeloid progenitor C/EBP $\alpha$  and C/EBP $\beta$  expression before (control) and after G-CSF (10 ng/ml) stimulation for 18 hrs in liquid culture. RNA was pooled from 4 mice per group, quantitative RT-PCR results were normalized to 18s RNA and are represented relative to expression in untreated B6 HSC, which has been assigned a value of 1. Data are shown as relative transcript expression  $\pm$  s.d. and are representative of at least 3 independent experiments. (b) Transcript expression of regulatory components of the G-CSFR signaling pathway determined in the same manner as in (a) and representative of at least 4 independent experiments.

**Supplemental Figure 4:**

Granulocyte production in Bcl3 transgene positive and transgene negative Lin<sup>-</sup> NF- $\kappa$ B p50 deficient bone marrow cells. (left panel) Representative FACS analysis and (right

panel) mean percent abundance of NF- $\kappa$ B p50 deficient Lin<sup>-</sup> bone marrow cell cultures following 3 days of stimulation with 10 ng/ml of G-CSF, GM-CSF or IL-3 (N=3).

# Supplementary Figure 1

**a**

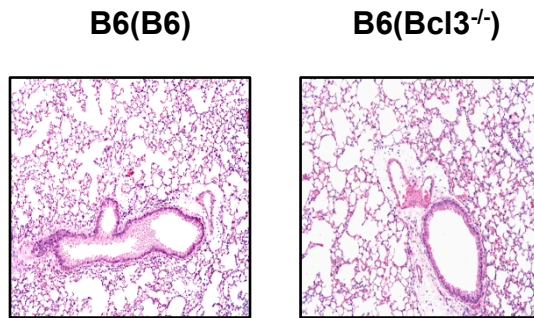

**b**

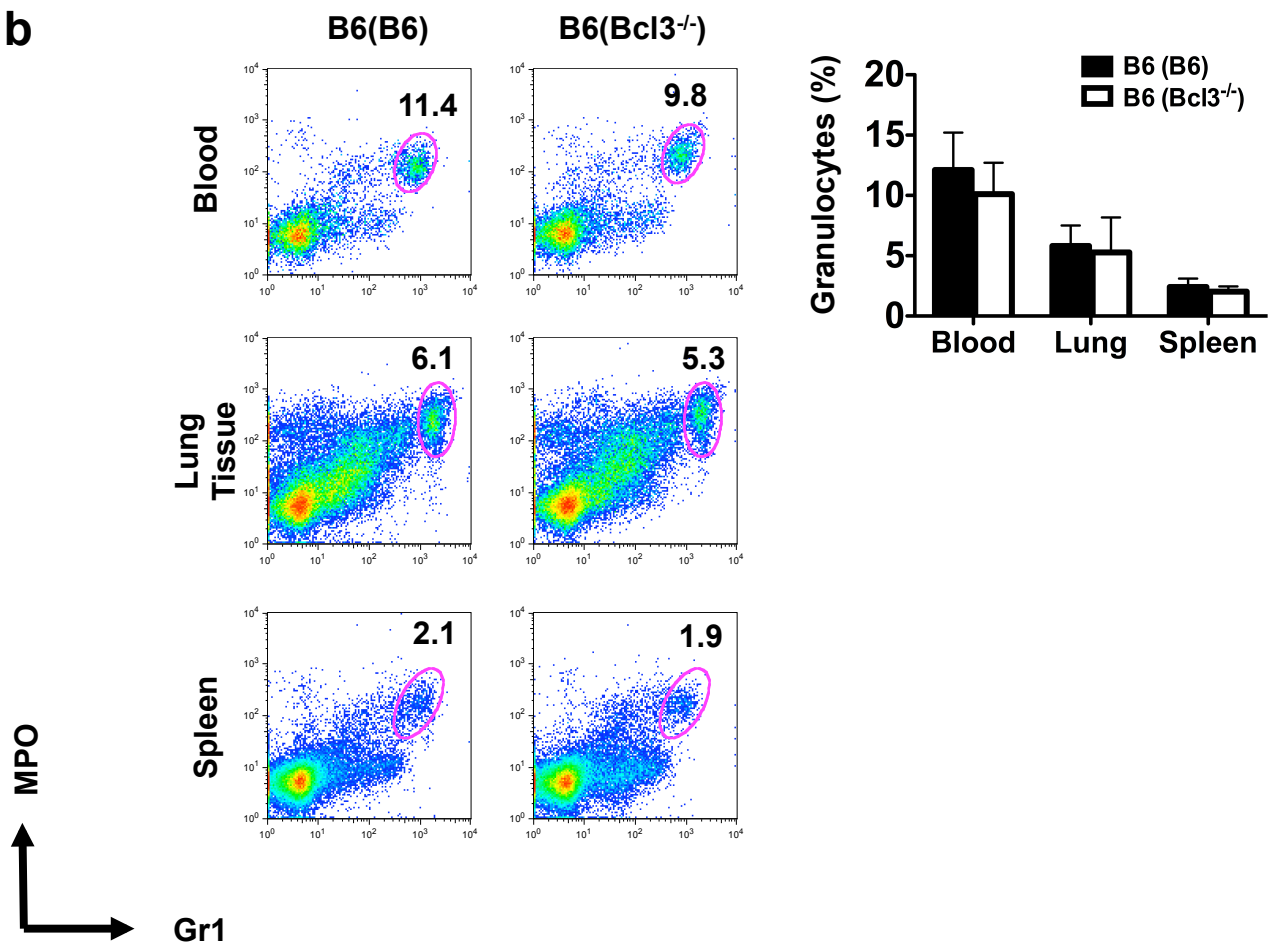

## Supplementary Figure 2

**a**

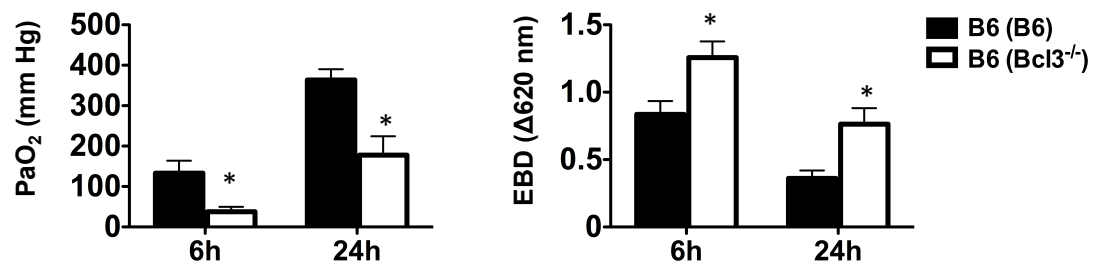

**b**

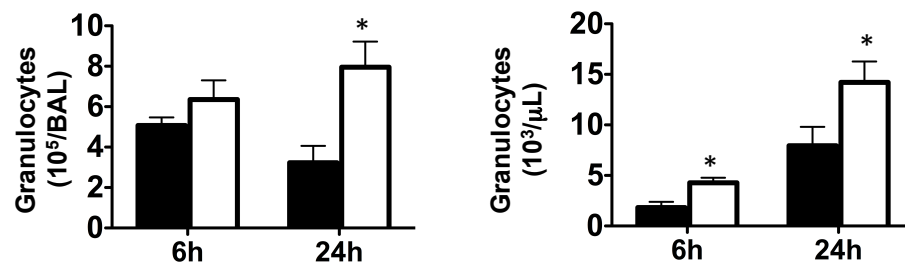

**c**

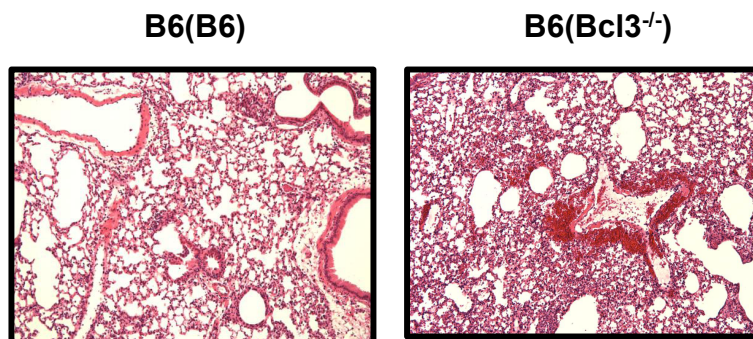

## Supplementary Figure 3

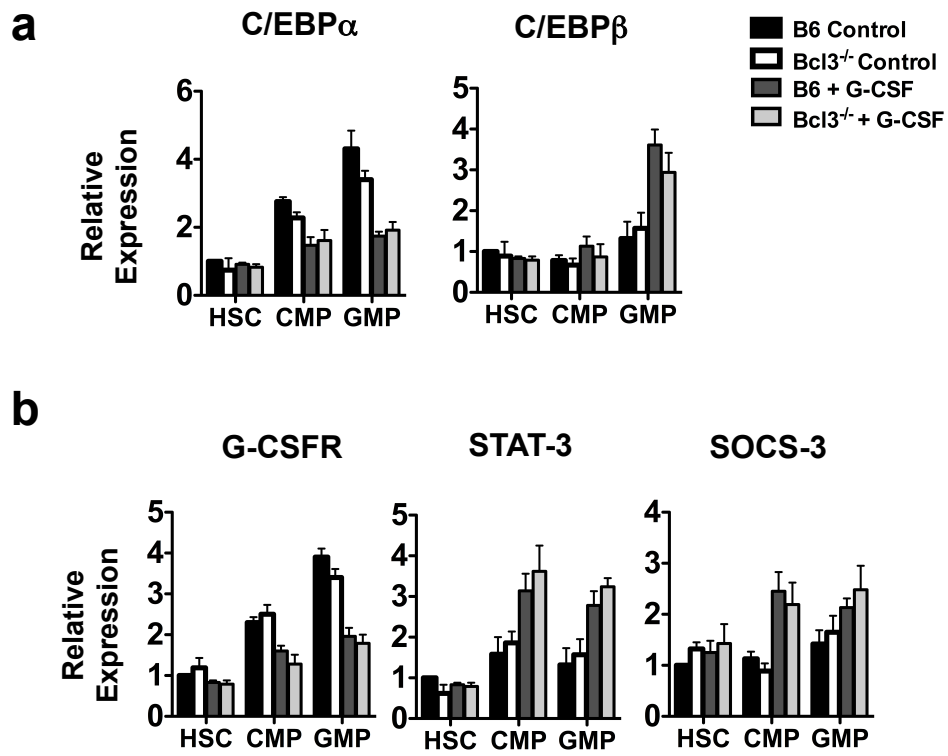

## Supplementary Figure 4

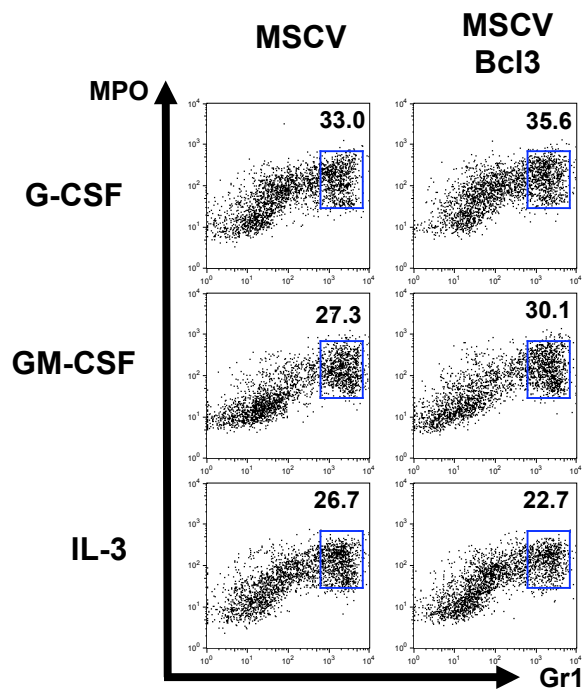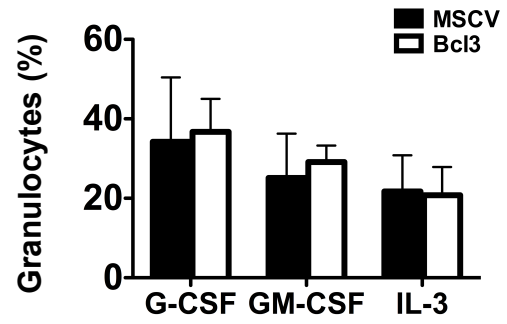

Supplement: JCI42596sd.pdf [file JCI42596sd.pdf]
